# Supplementary material
Source: MDPI journal article supplement (https://www.mdpi.com/2412-3811/8/6/100)

# Test PV1

Deck lateral view

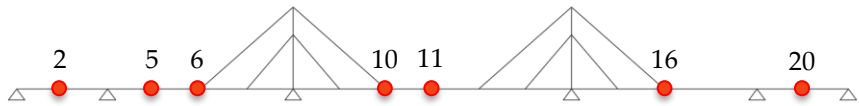

Deck cross section

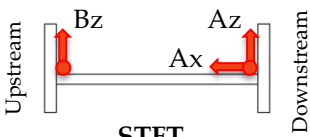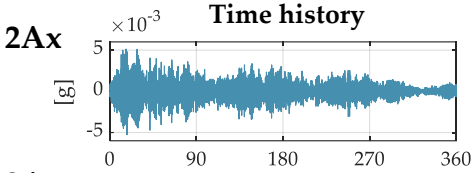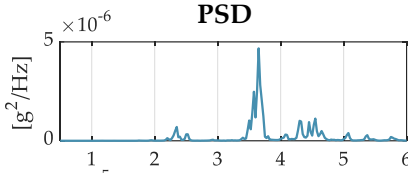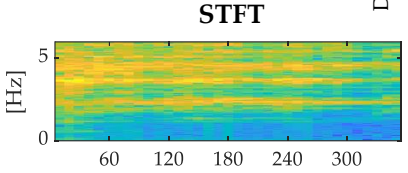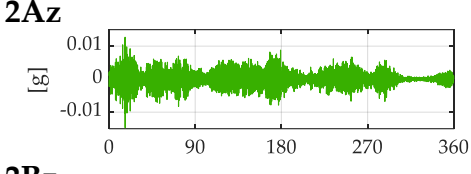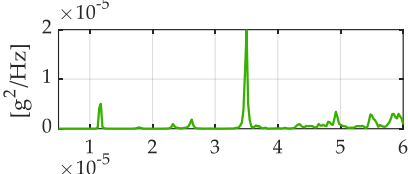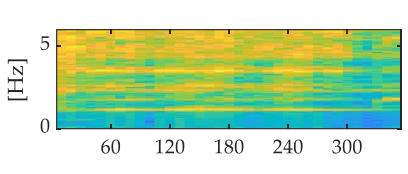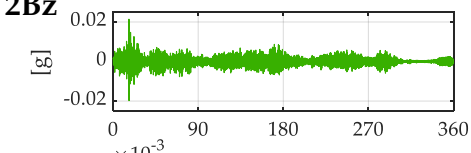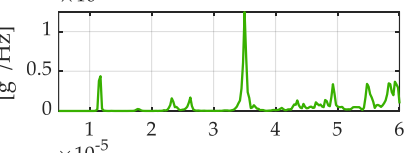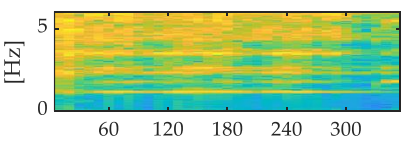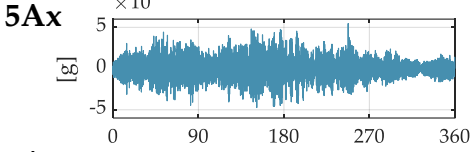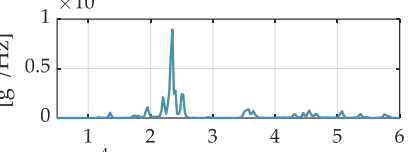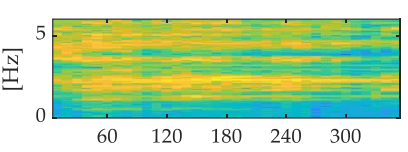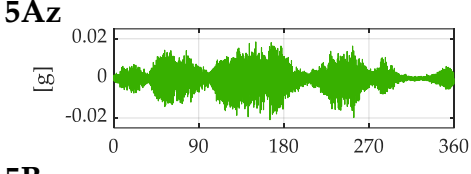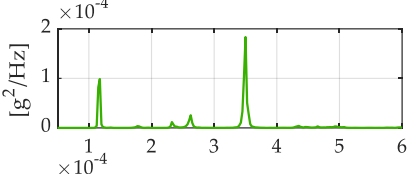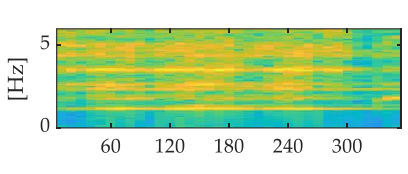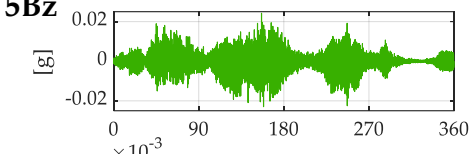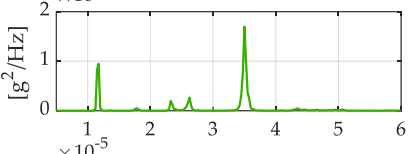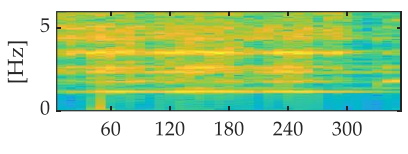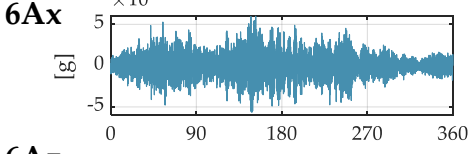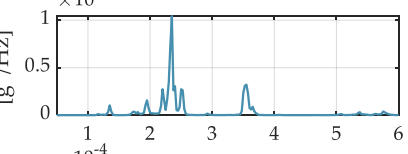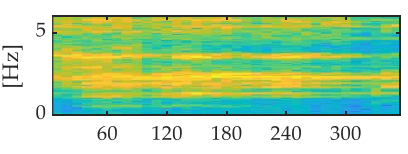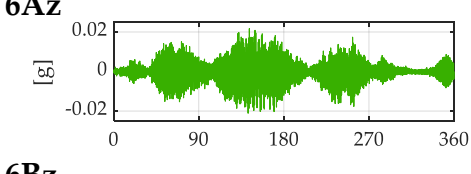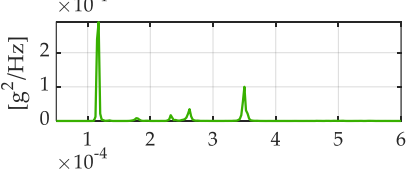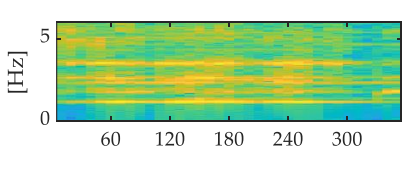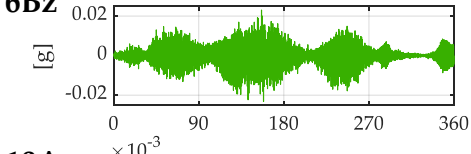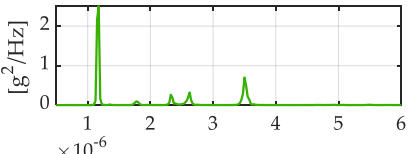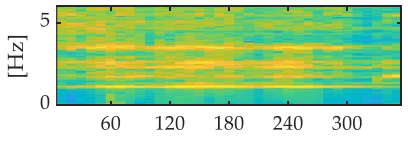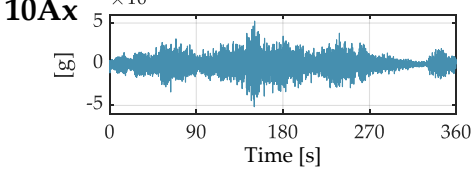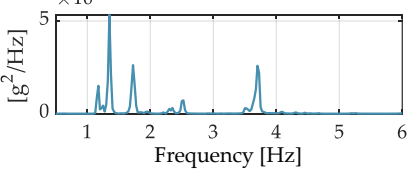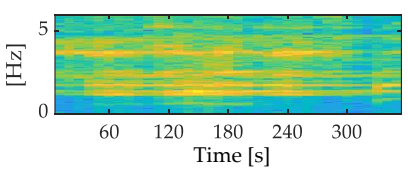

# Test PV1

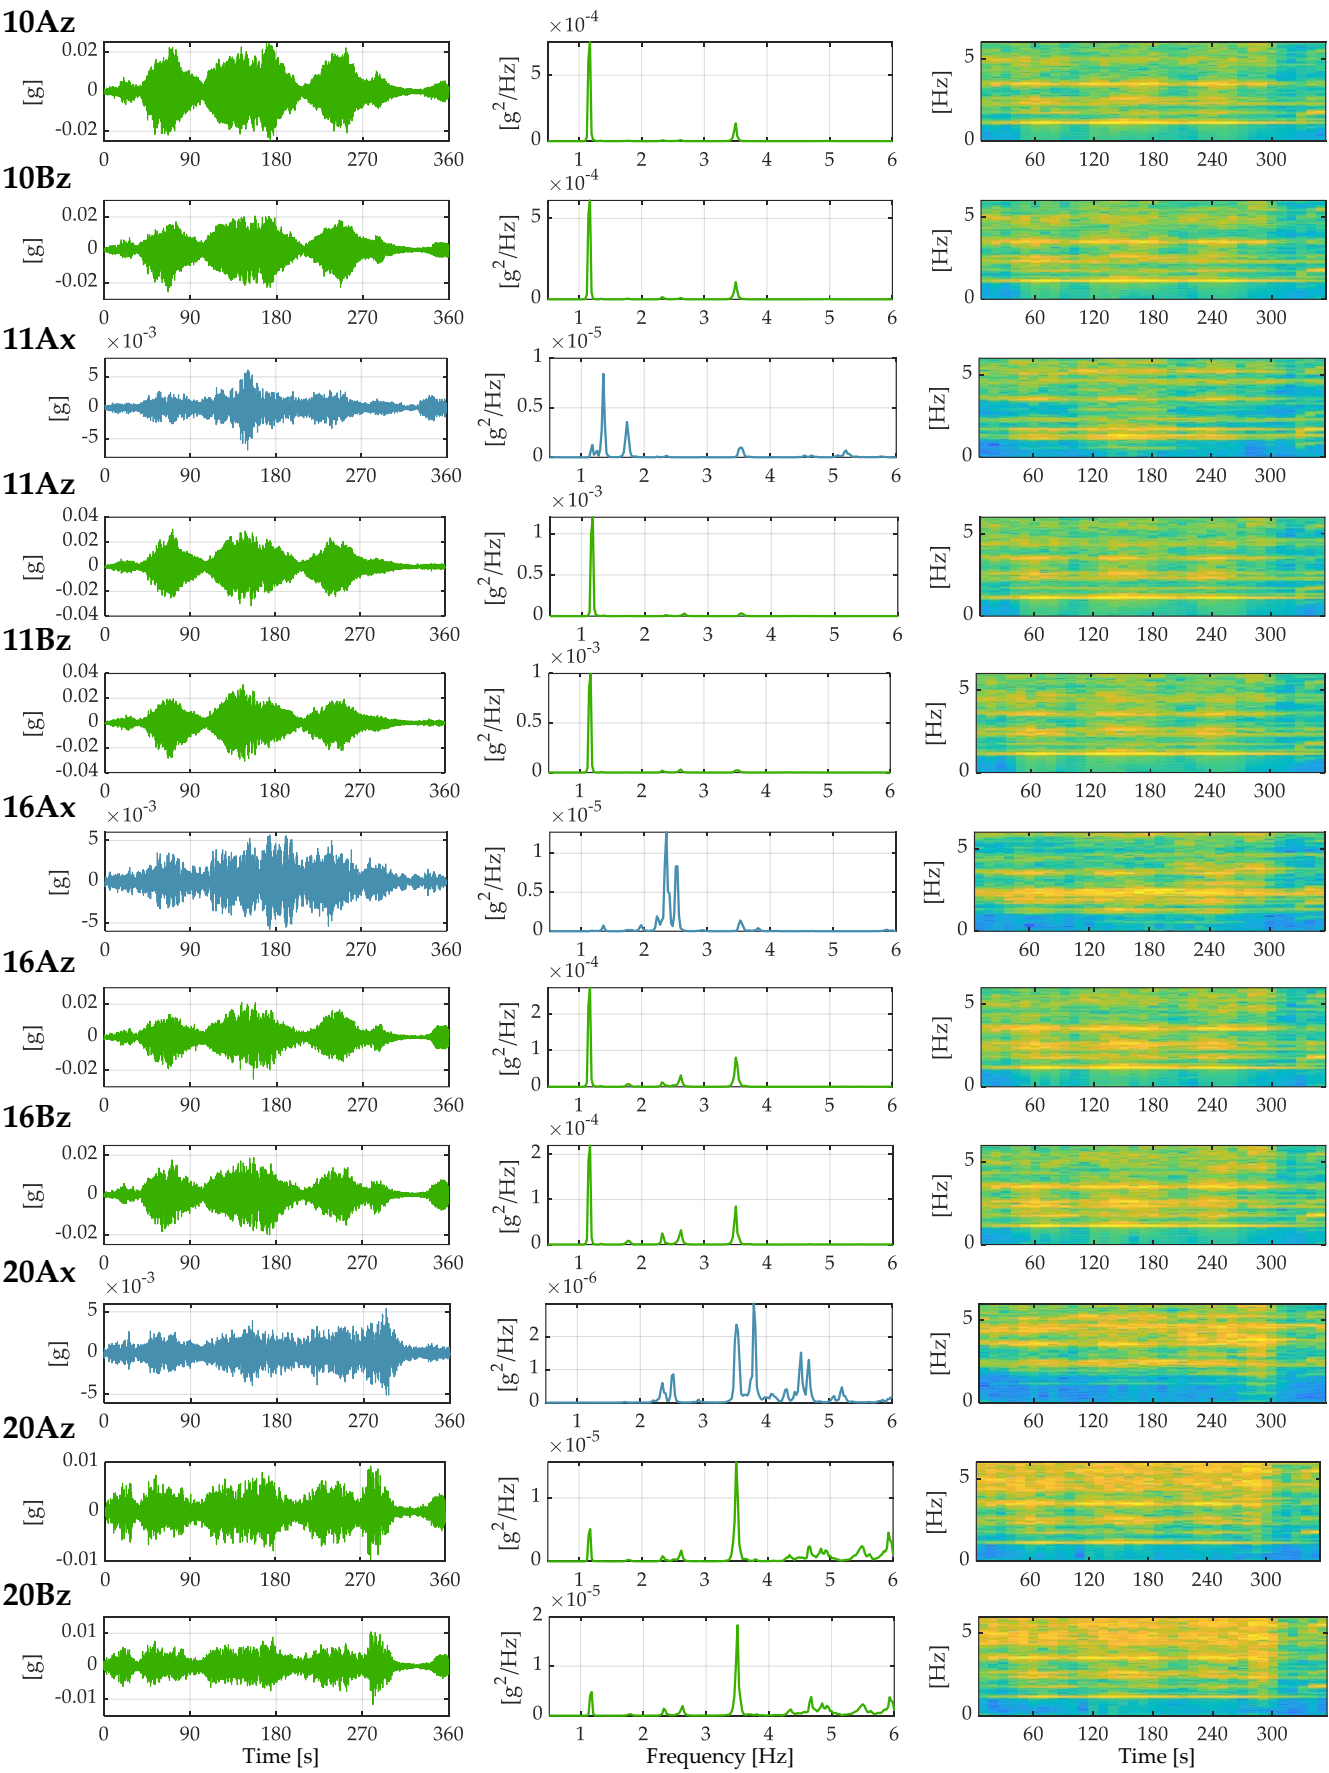

# Test PV2

Deck lateral view



Deck cross section

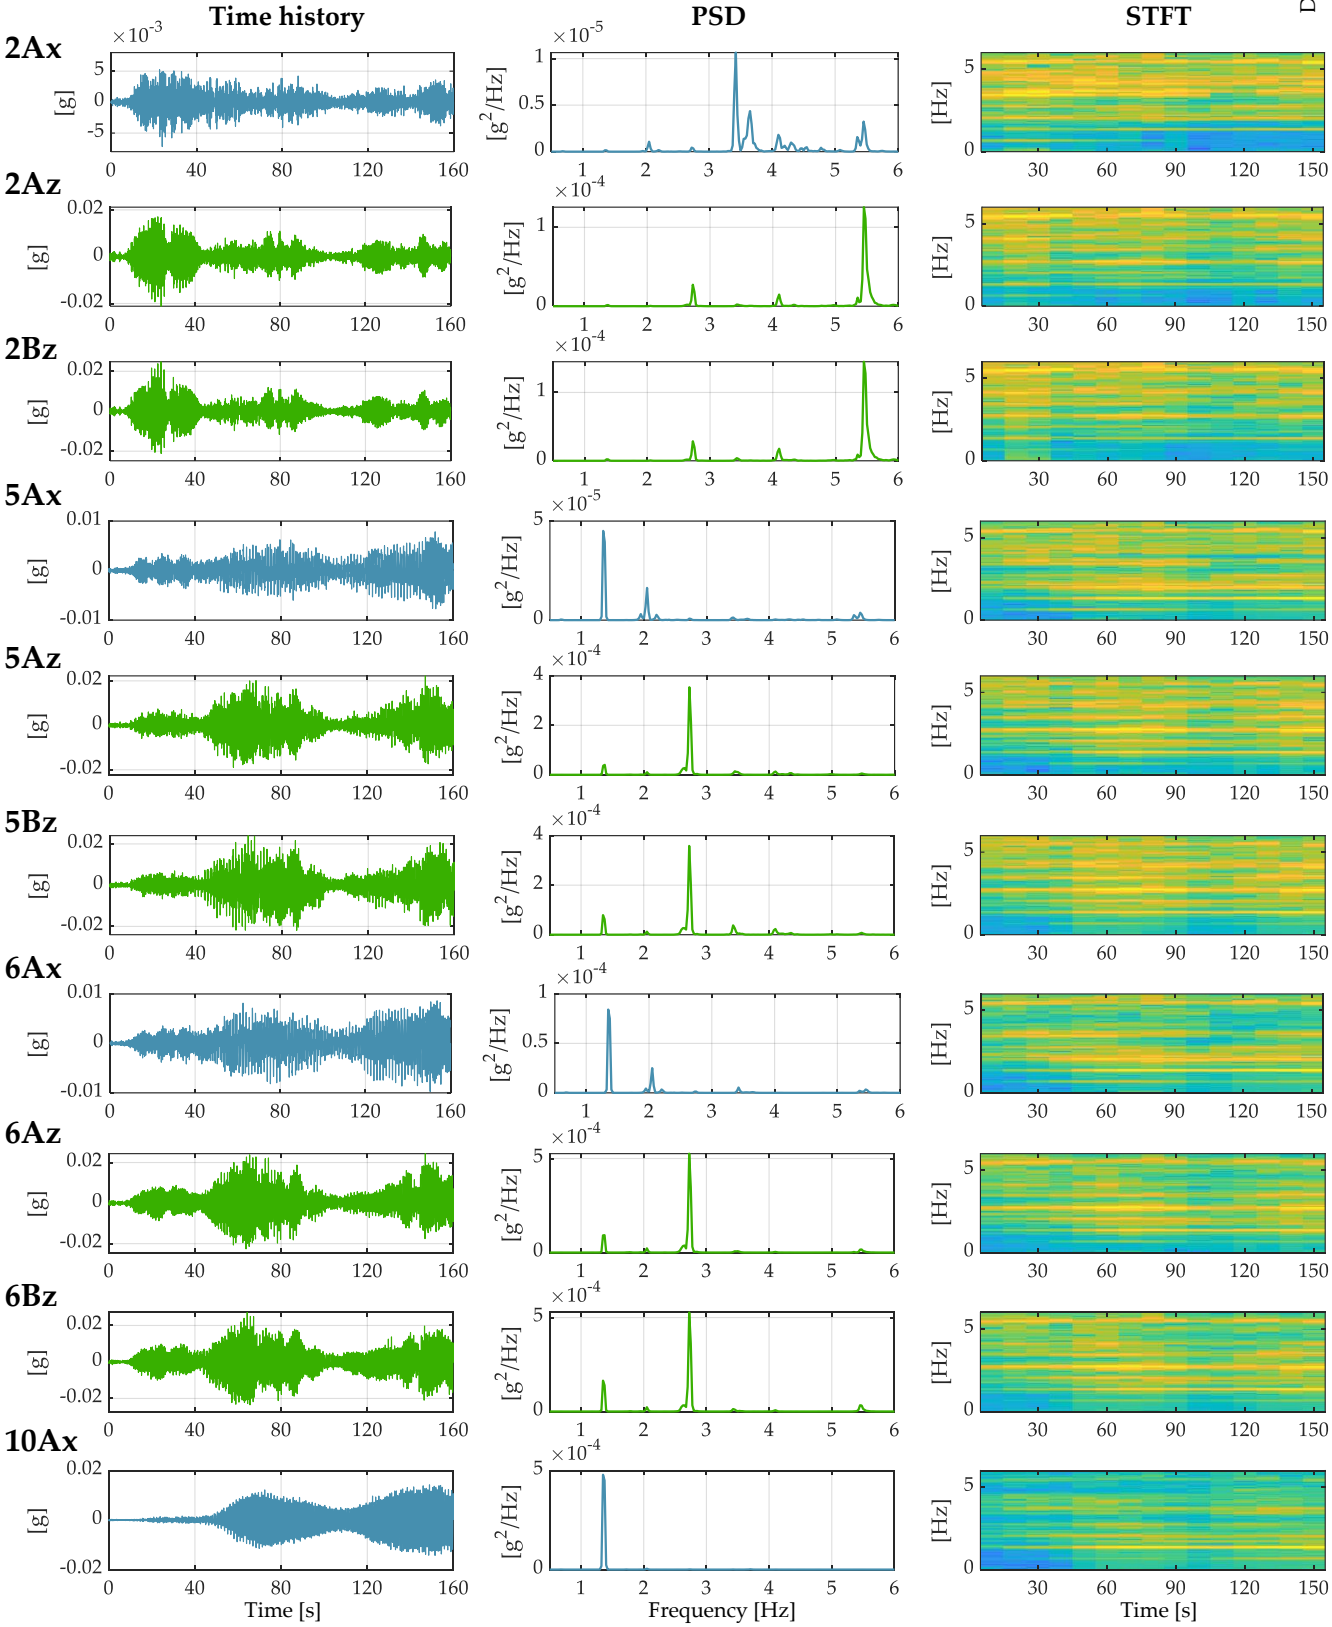

# Test PV2

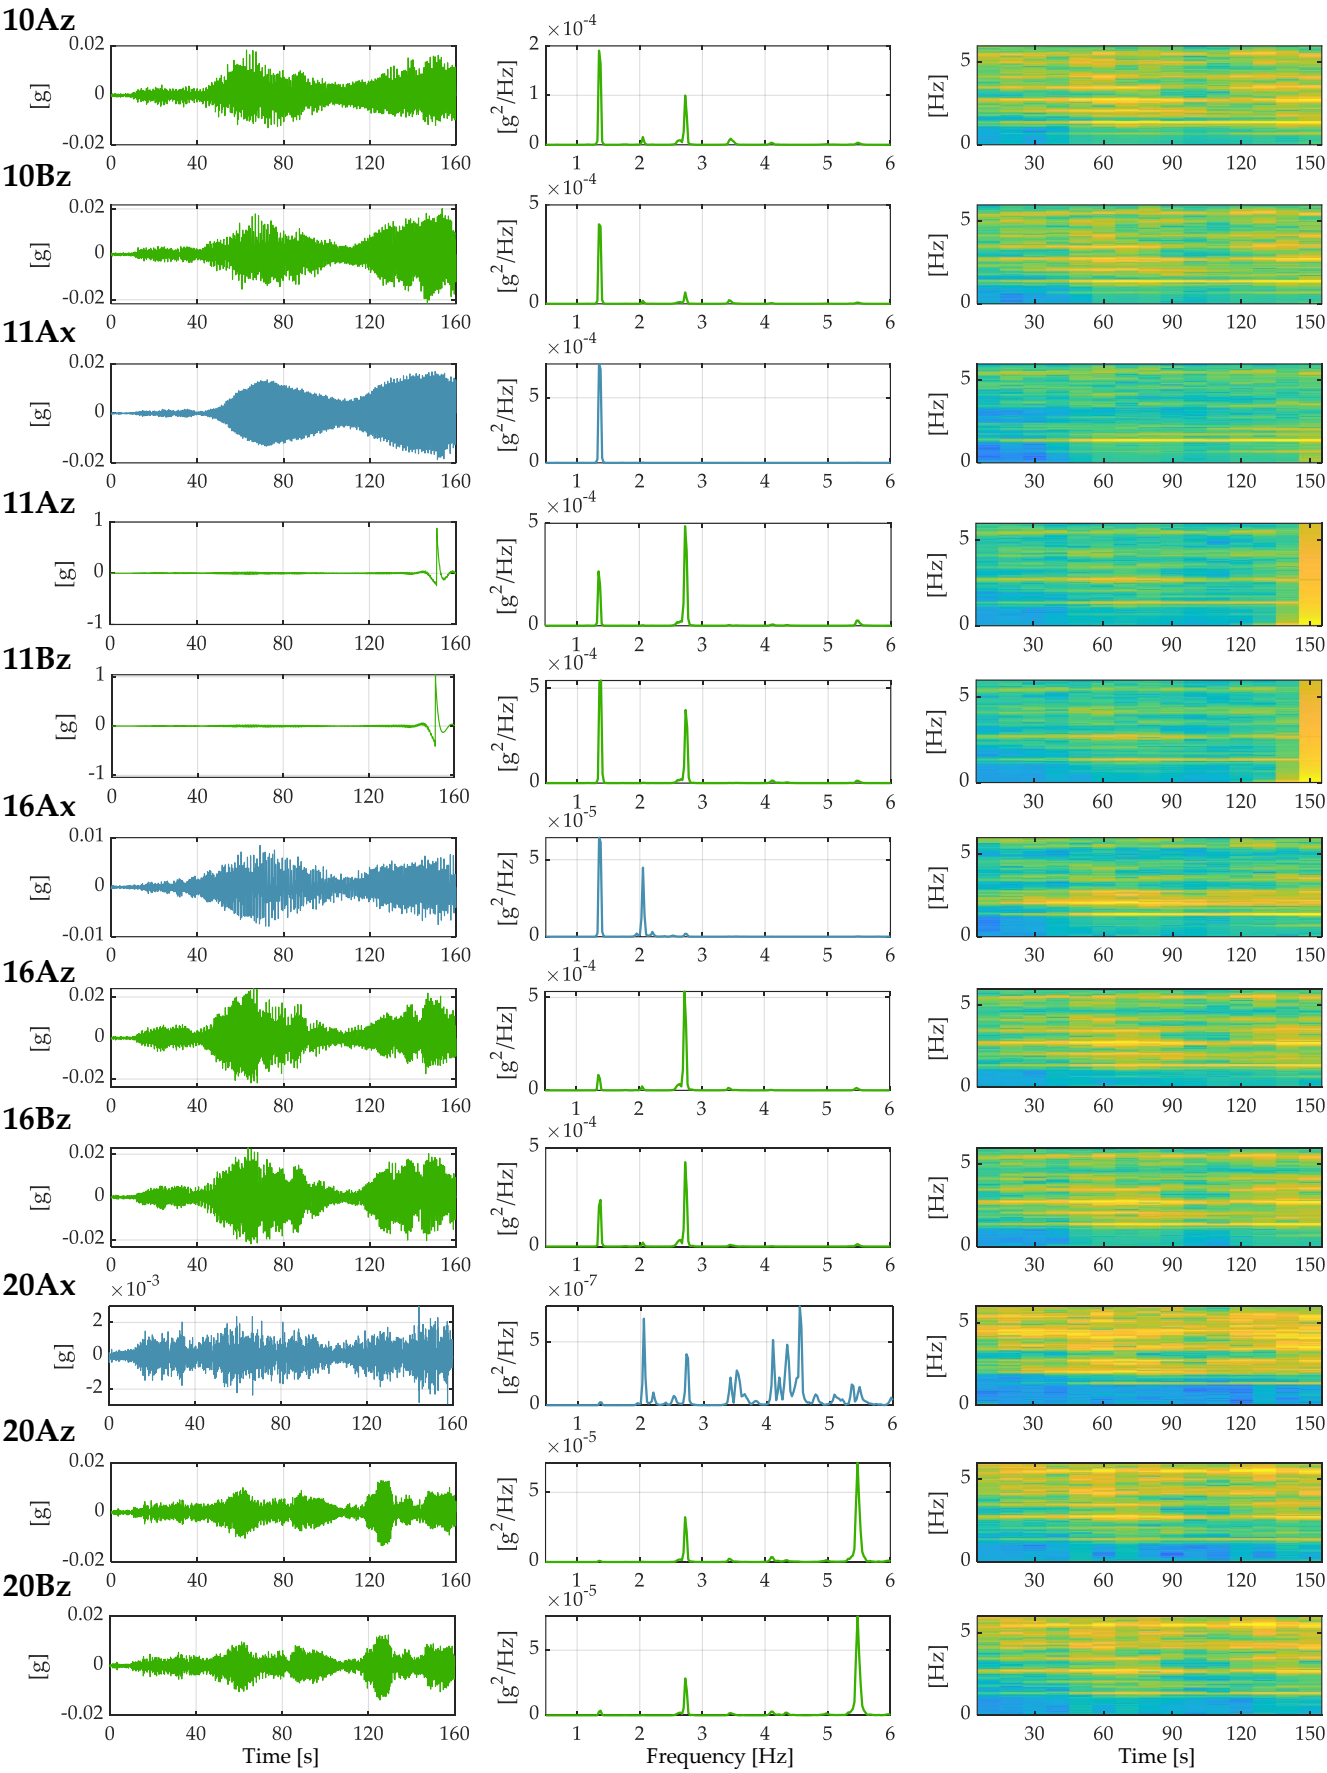

# Test PV3

Deck lateral view



Deck cross section

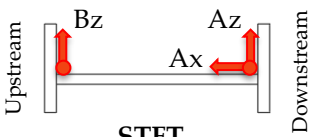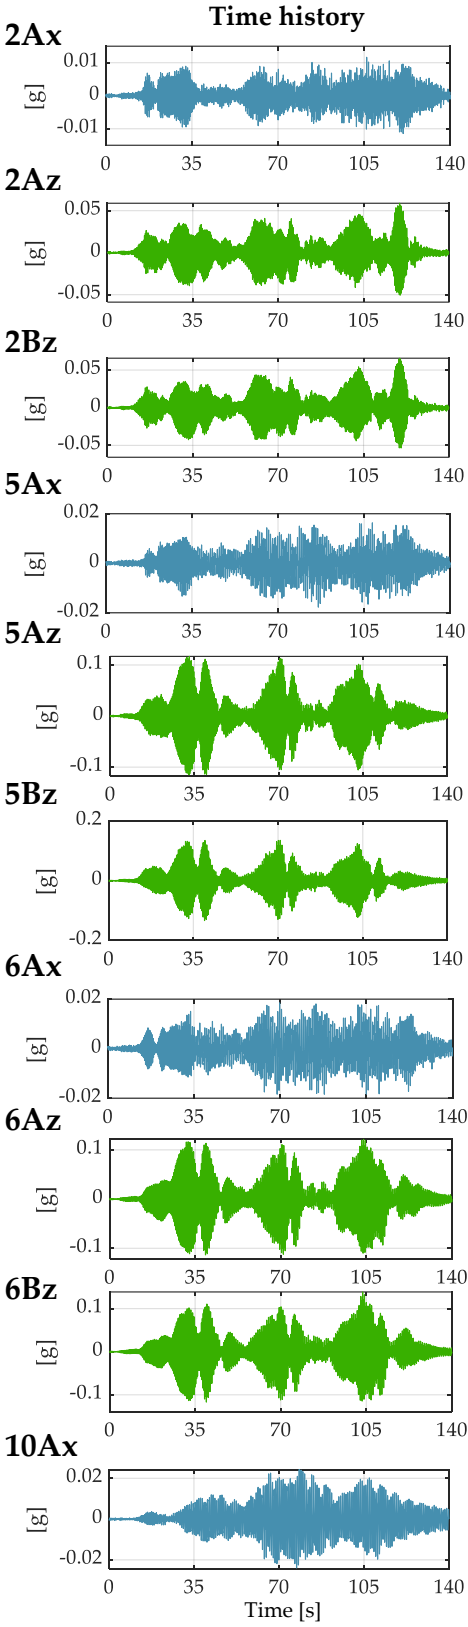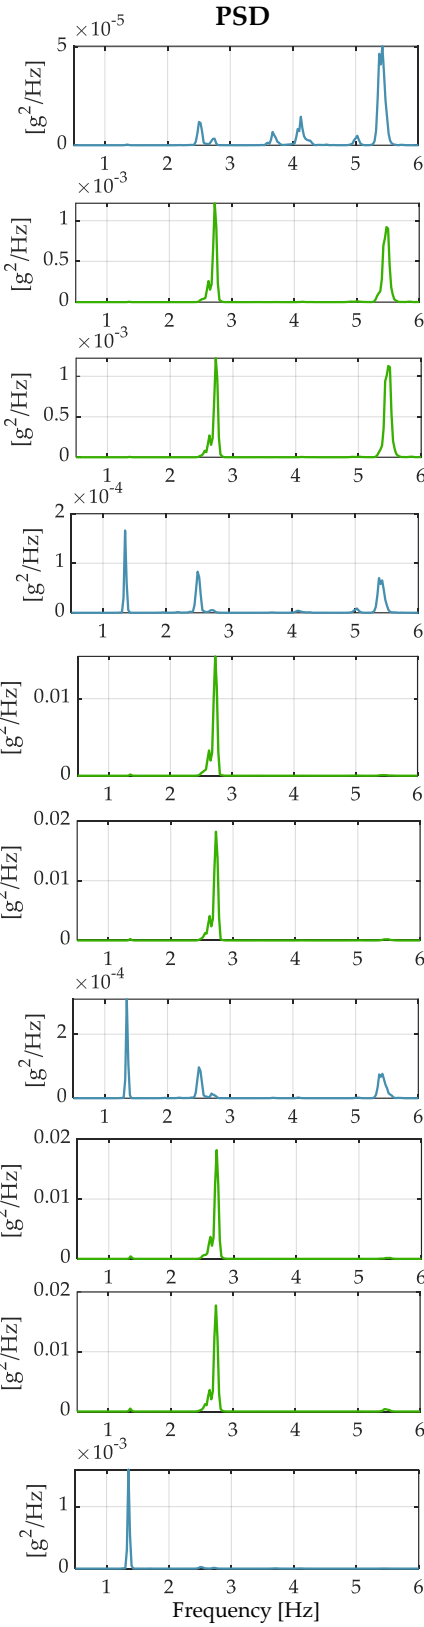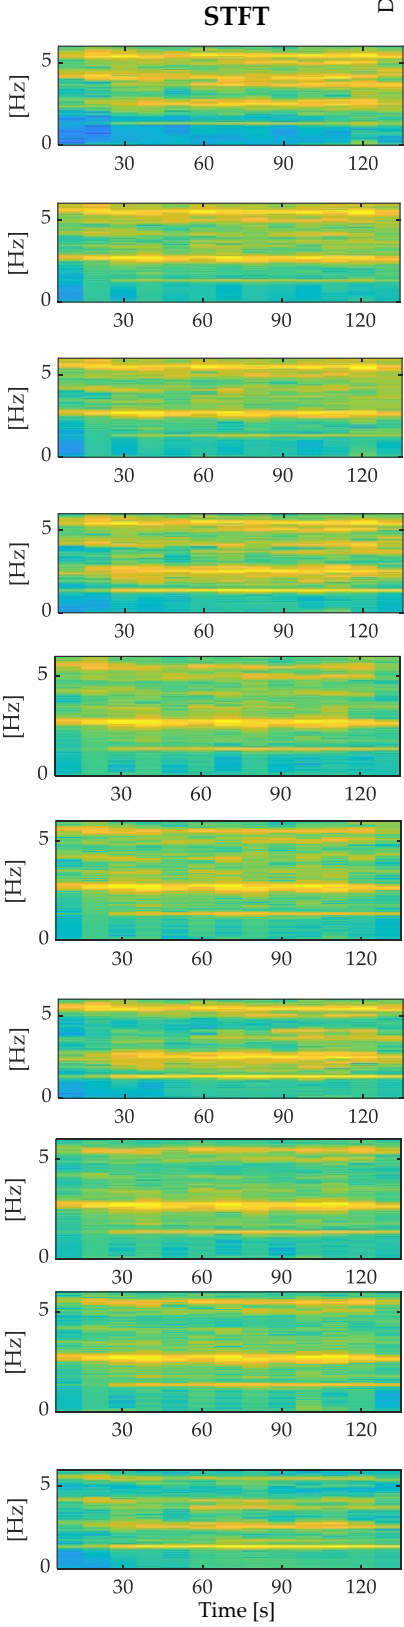

# Test PV3

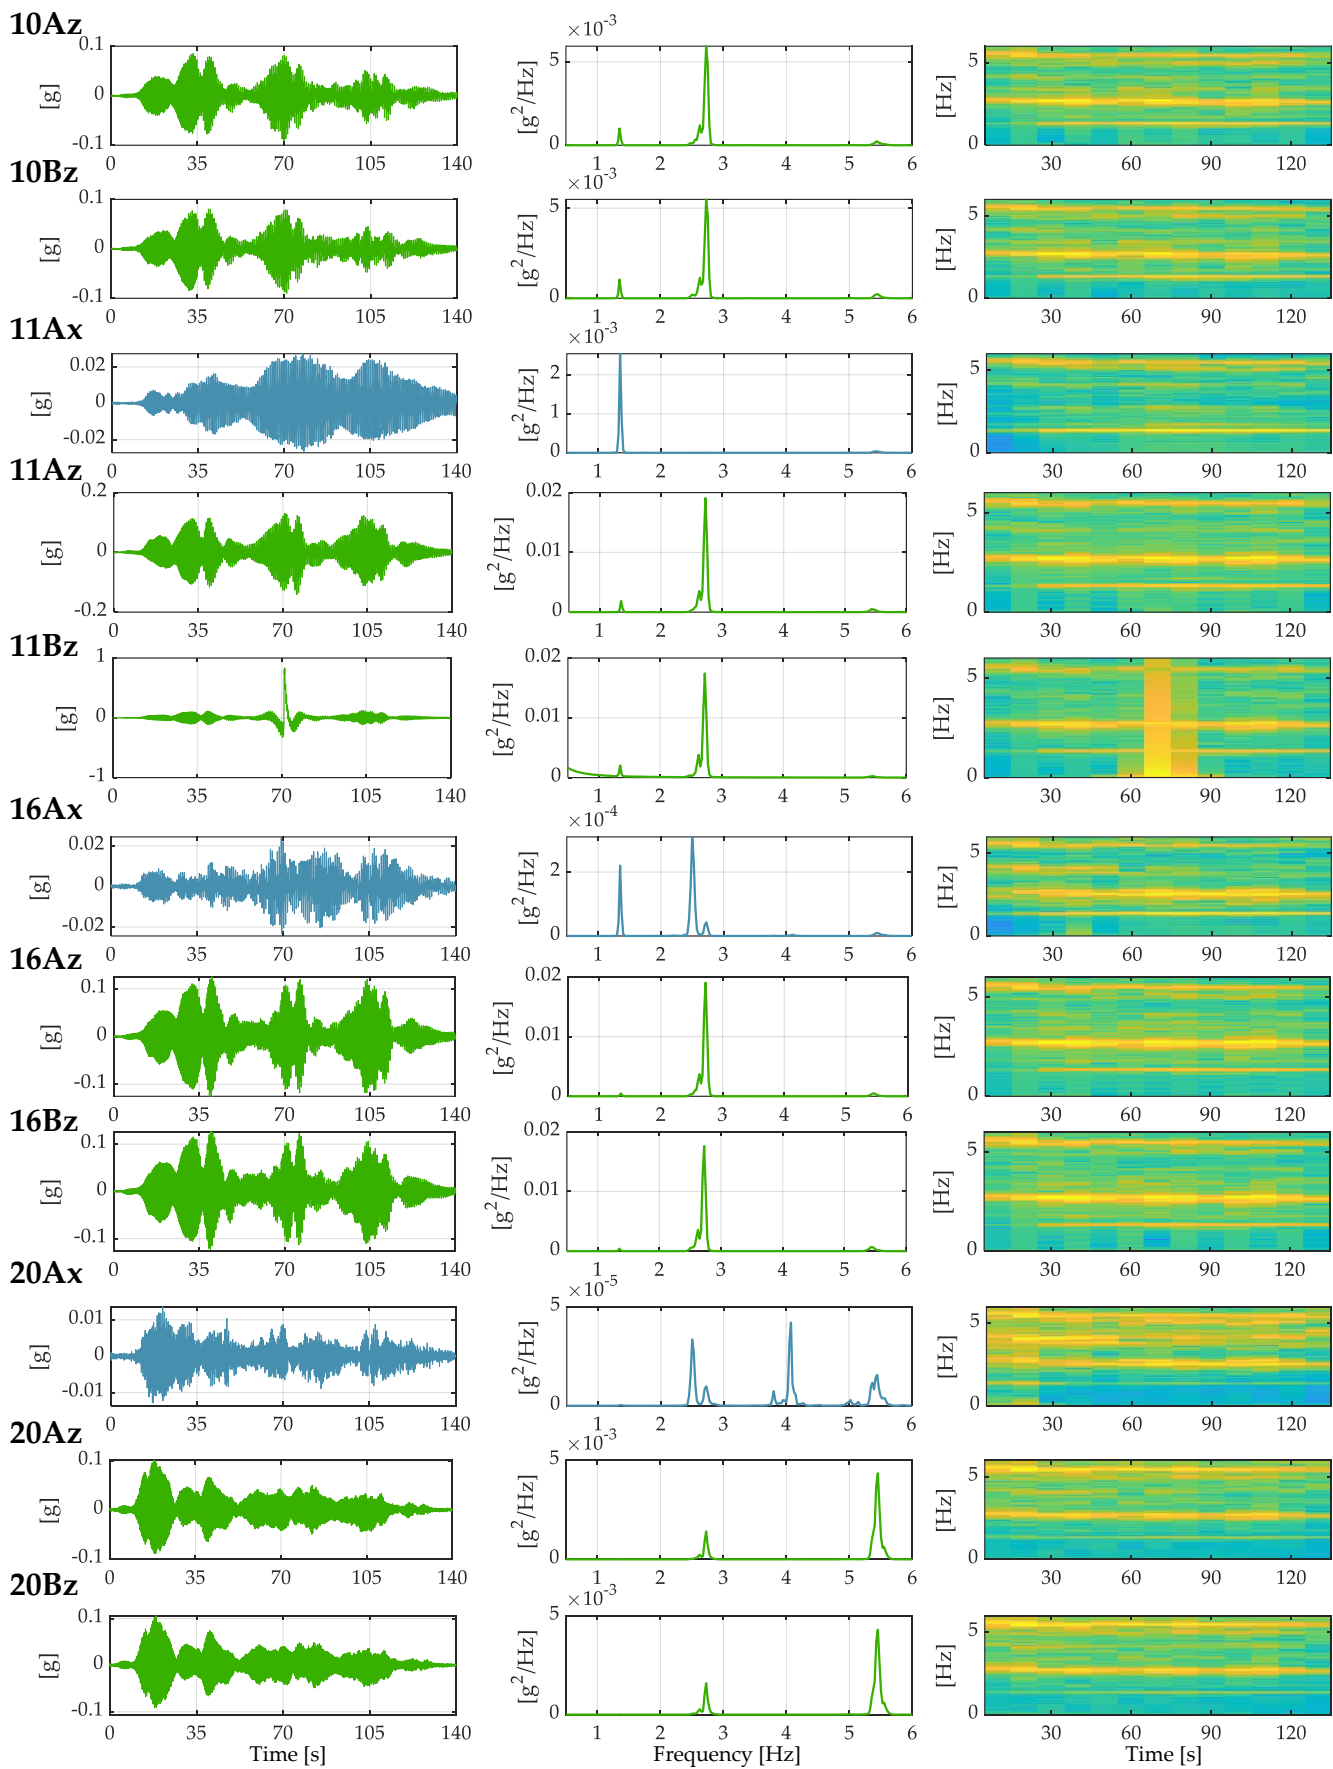

# Test PV4

Deck lateral view

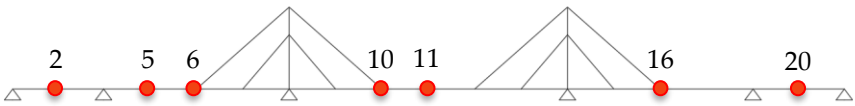

Deck cross section

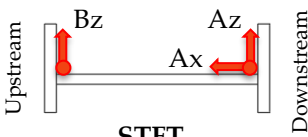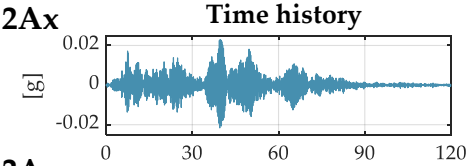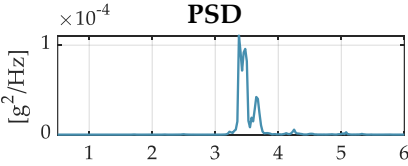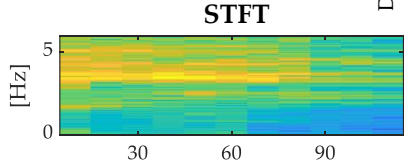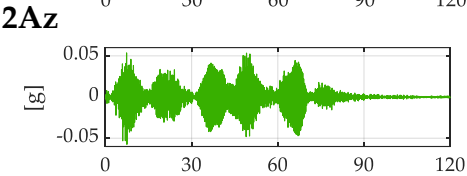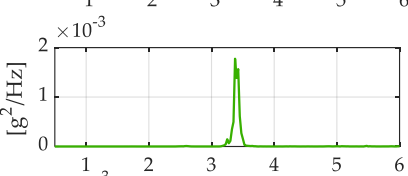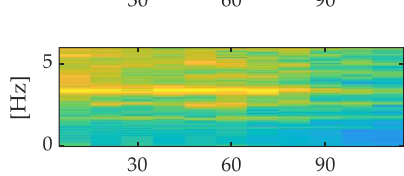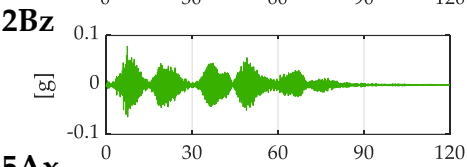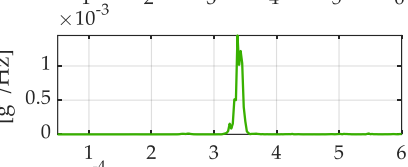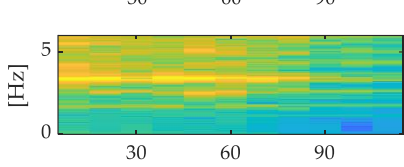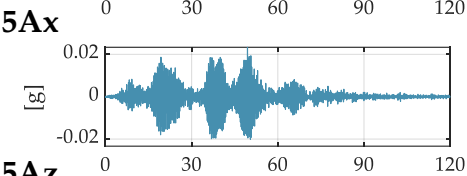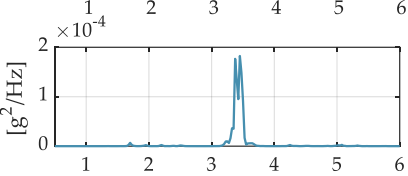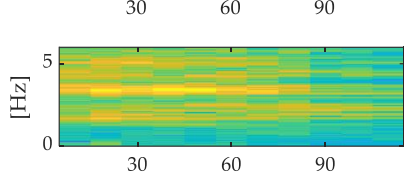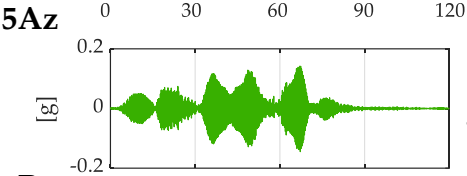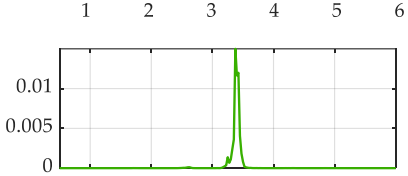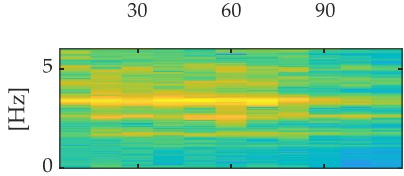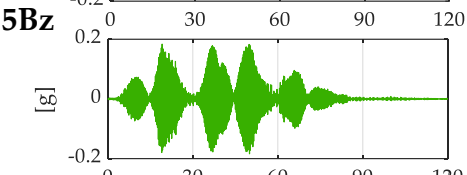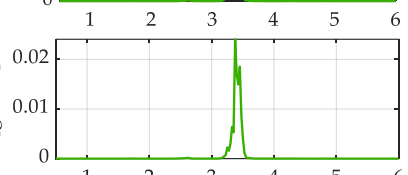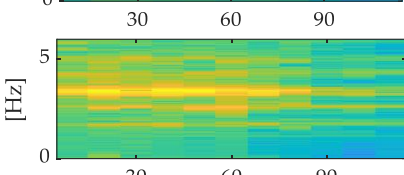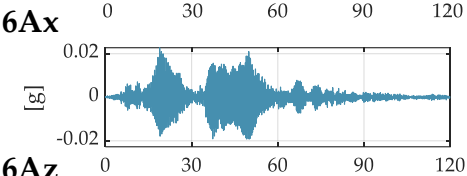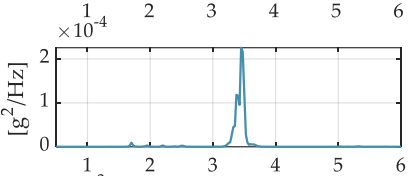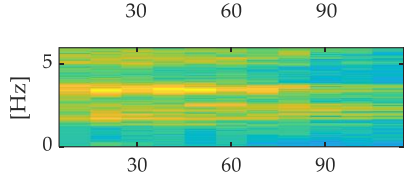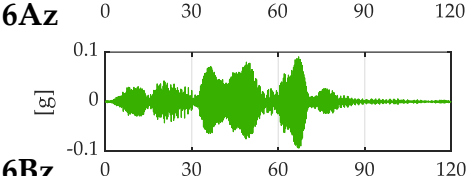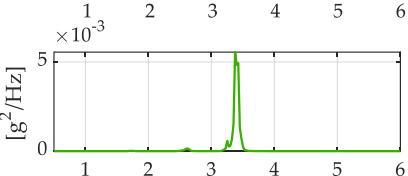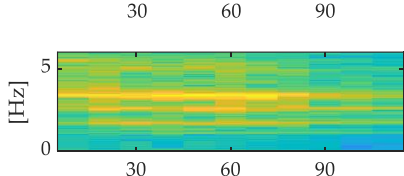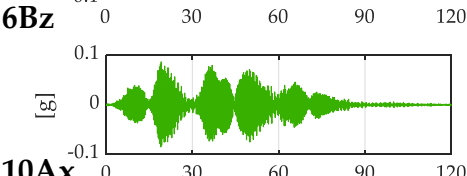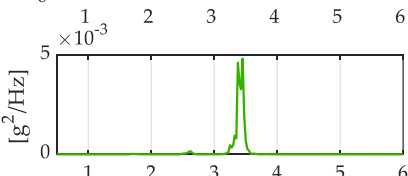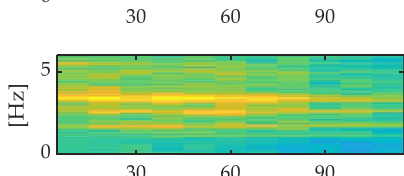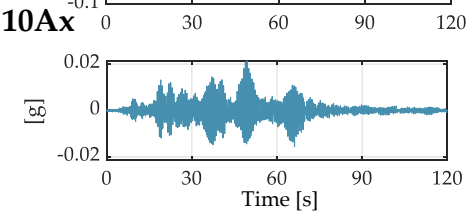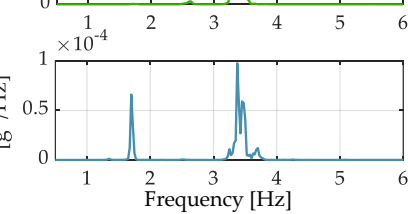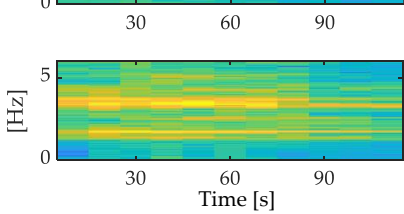

# Test PV4

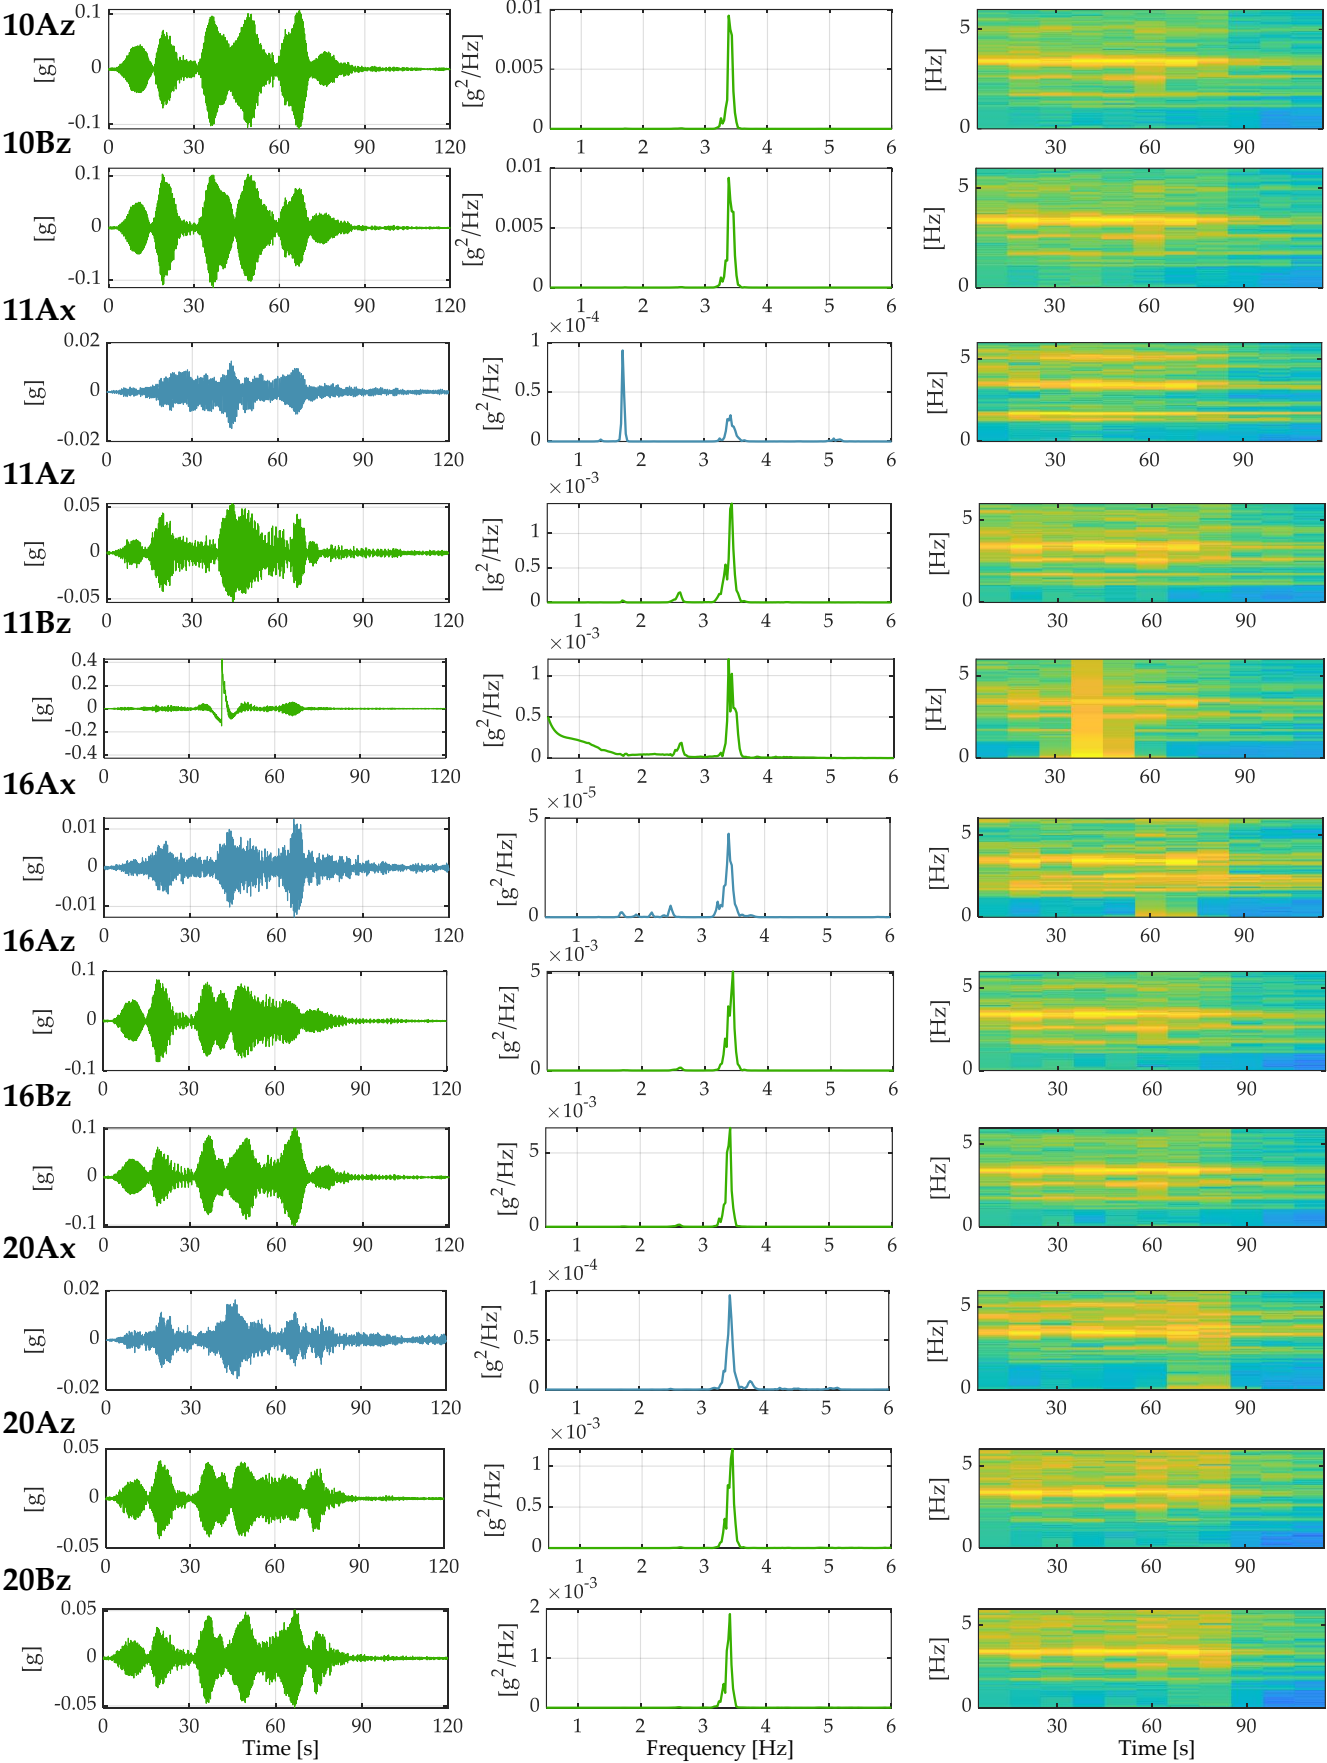

# Test PV5

Deck lateral view



Deck cross section

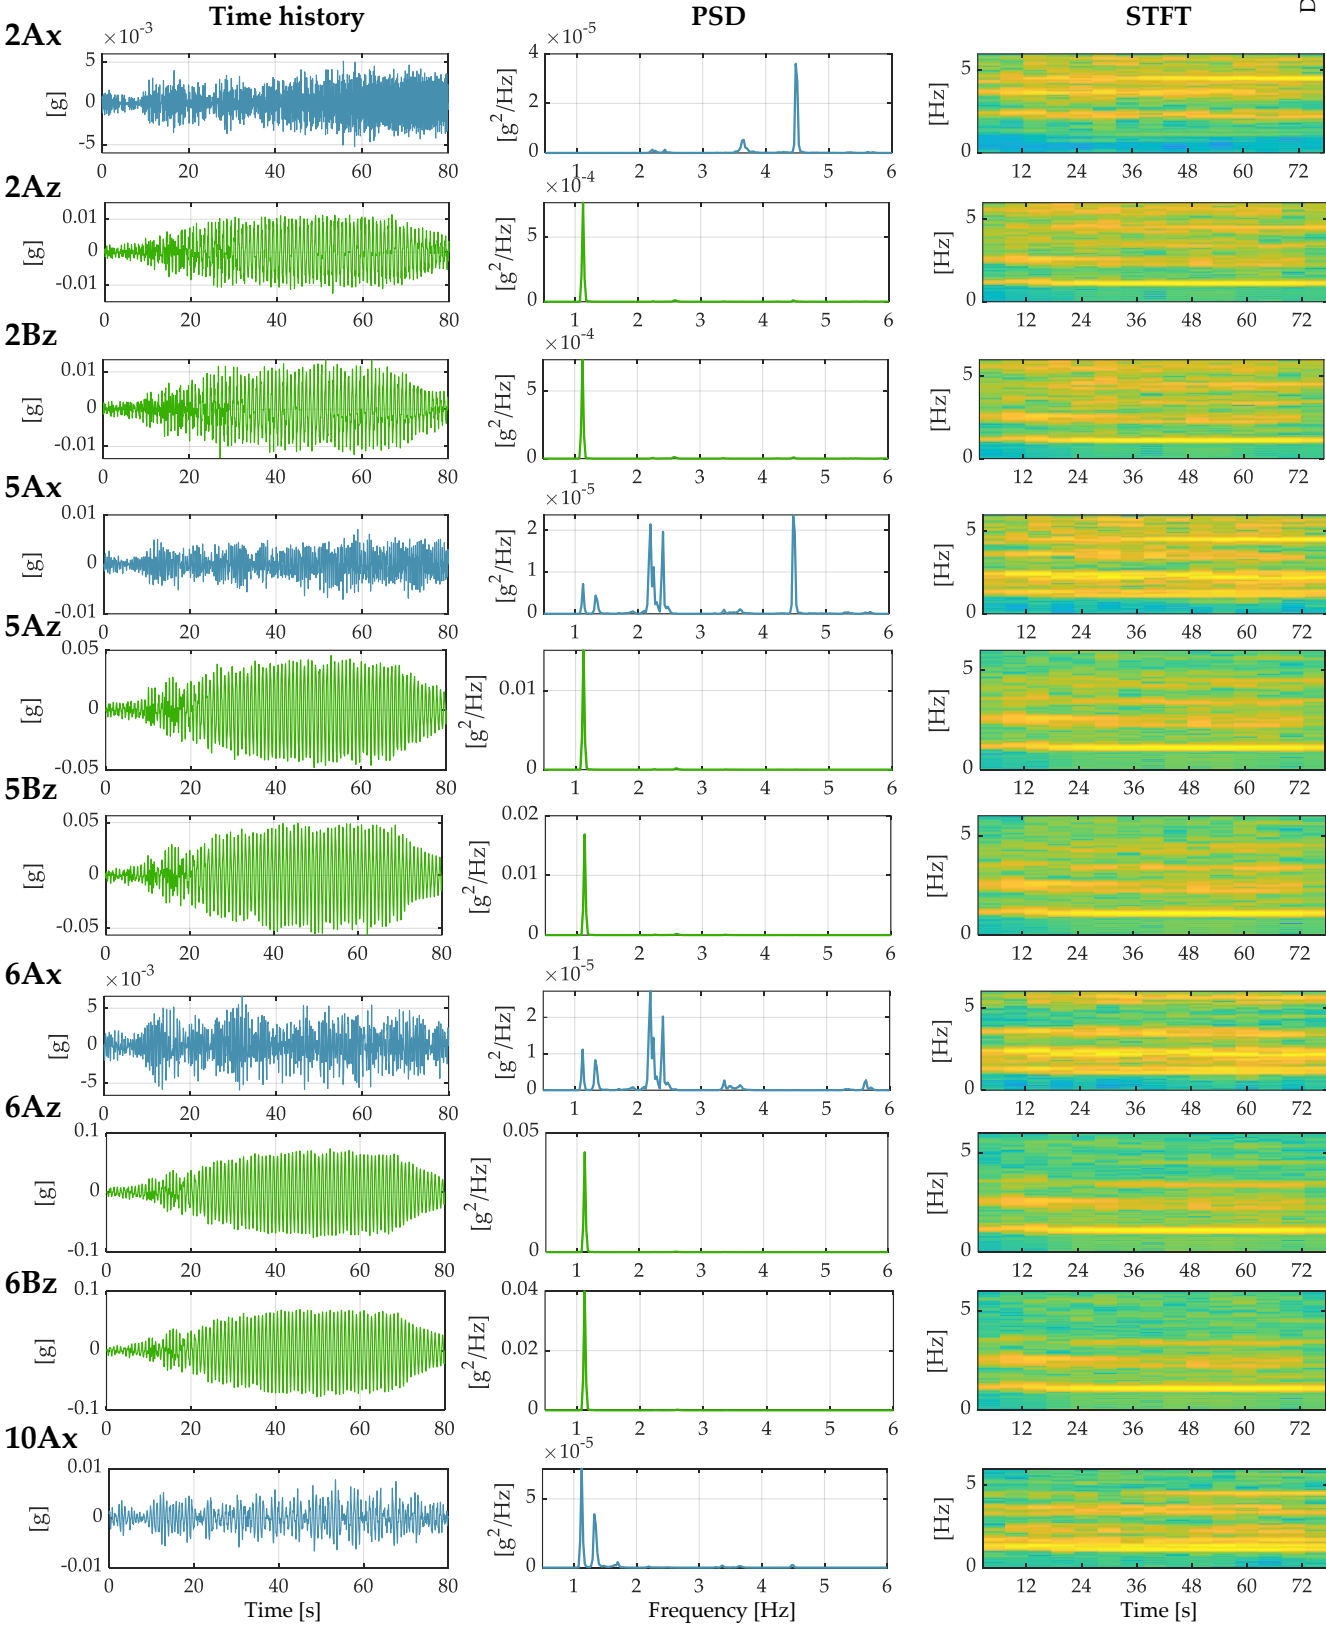

# Test PV5

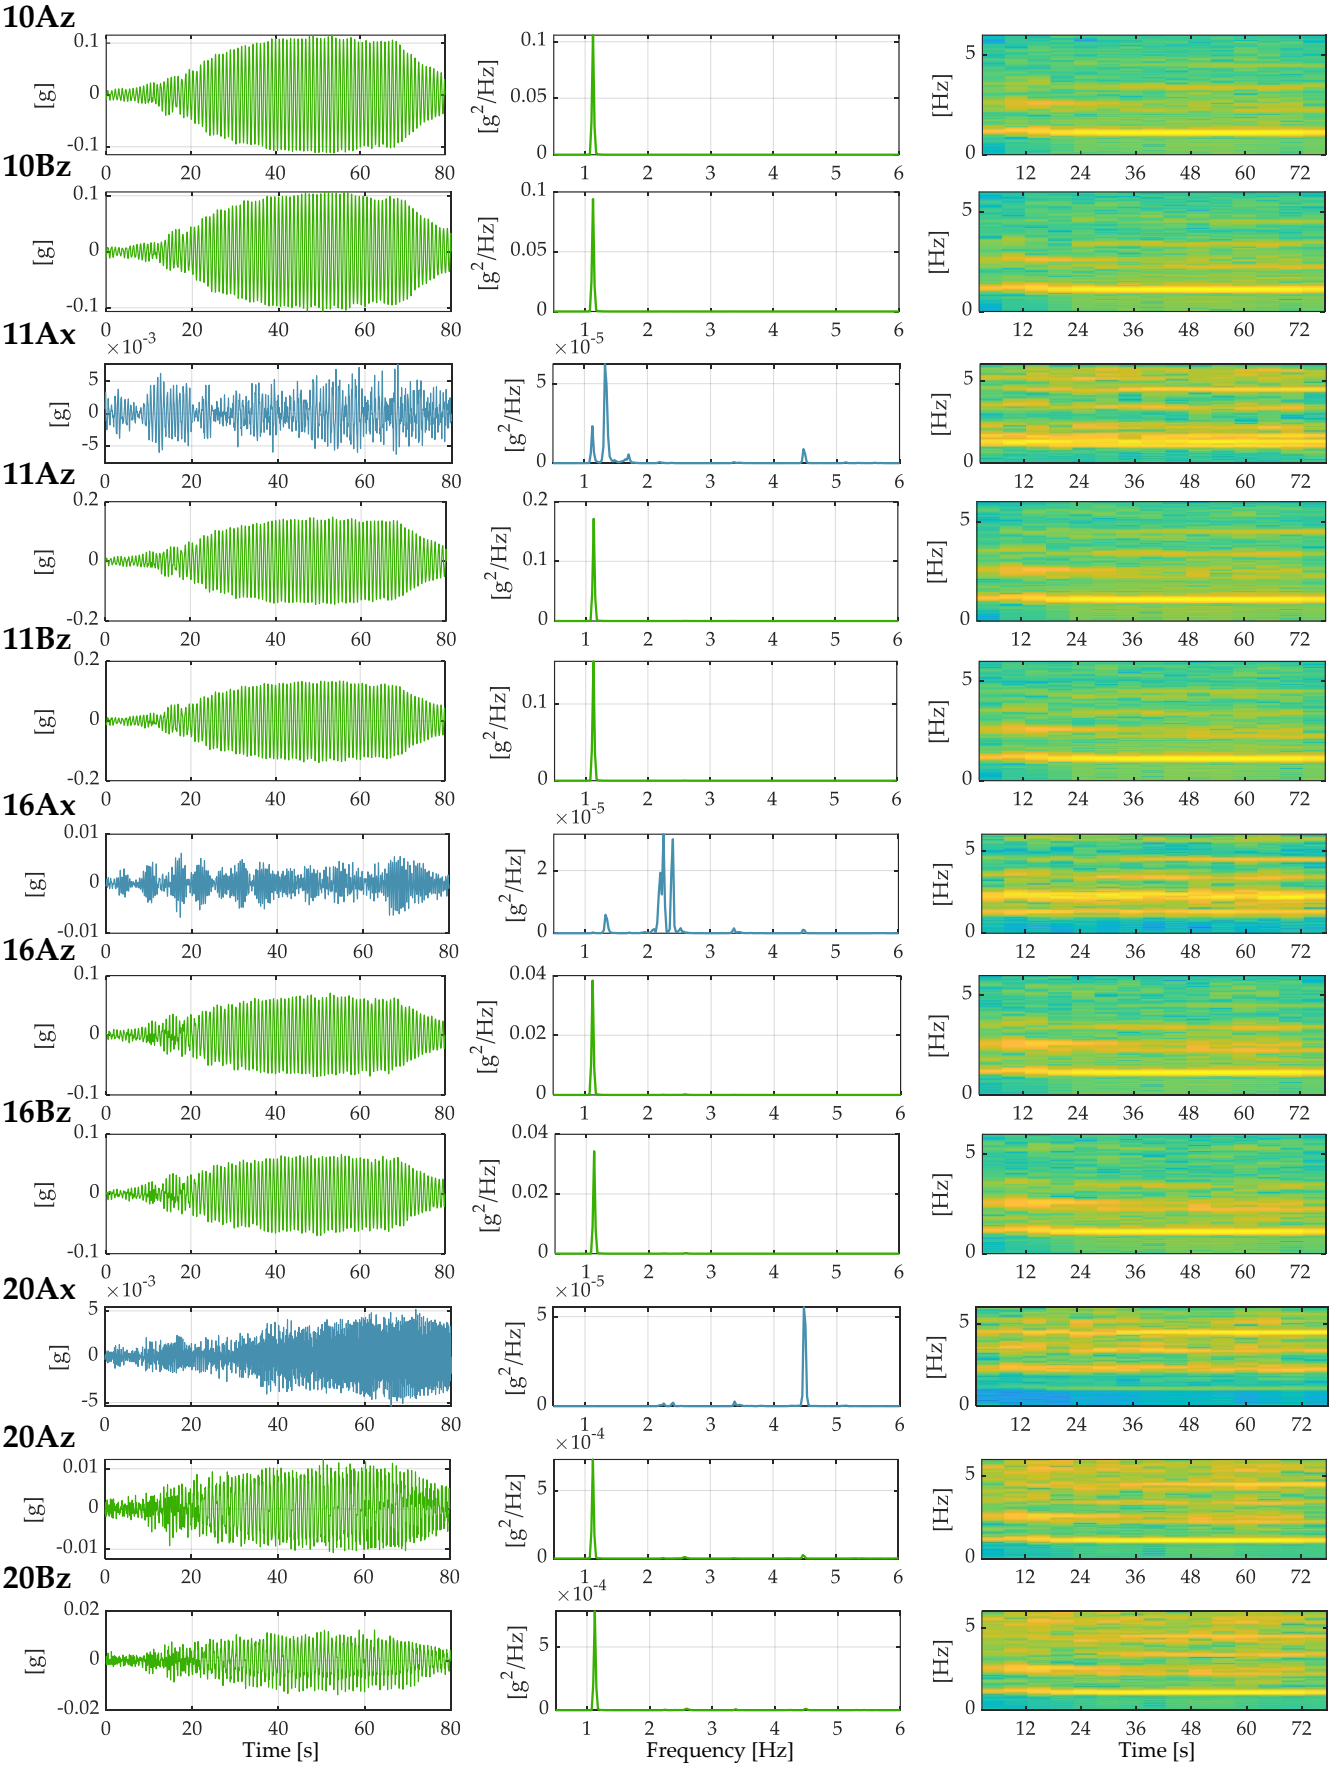

# Test PV6

Deck lateral view

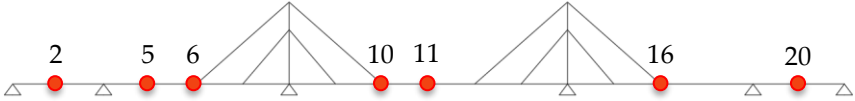

Deck cross section

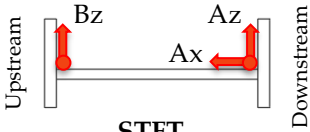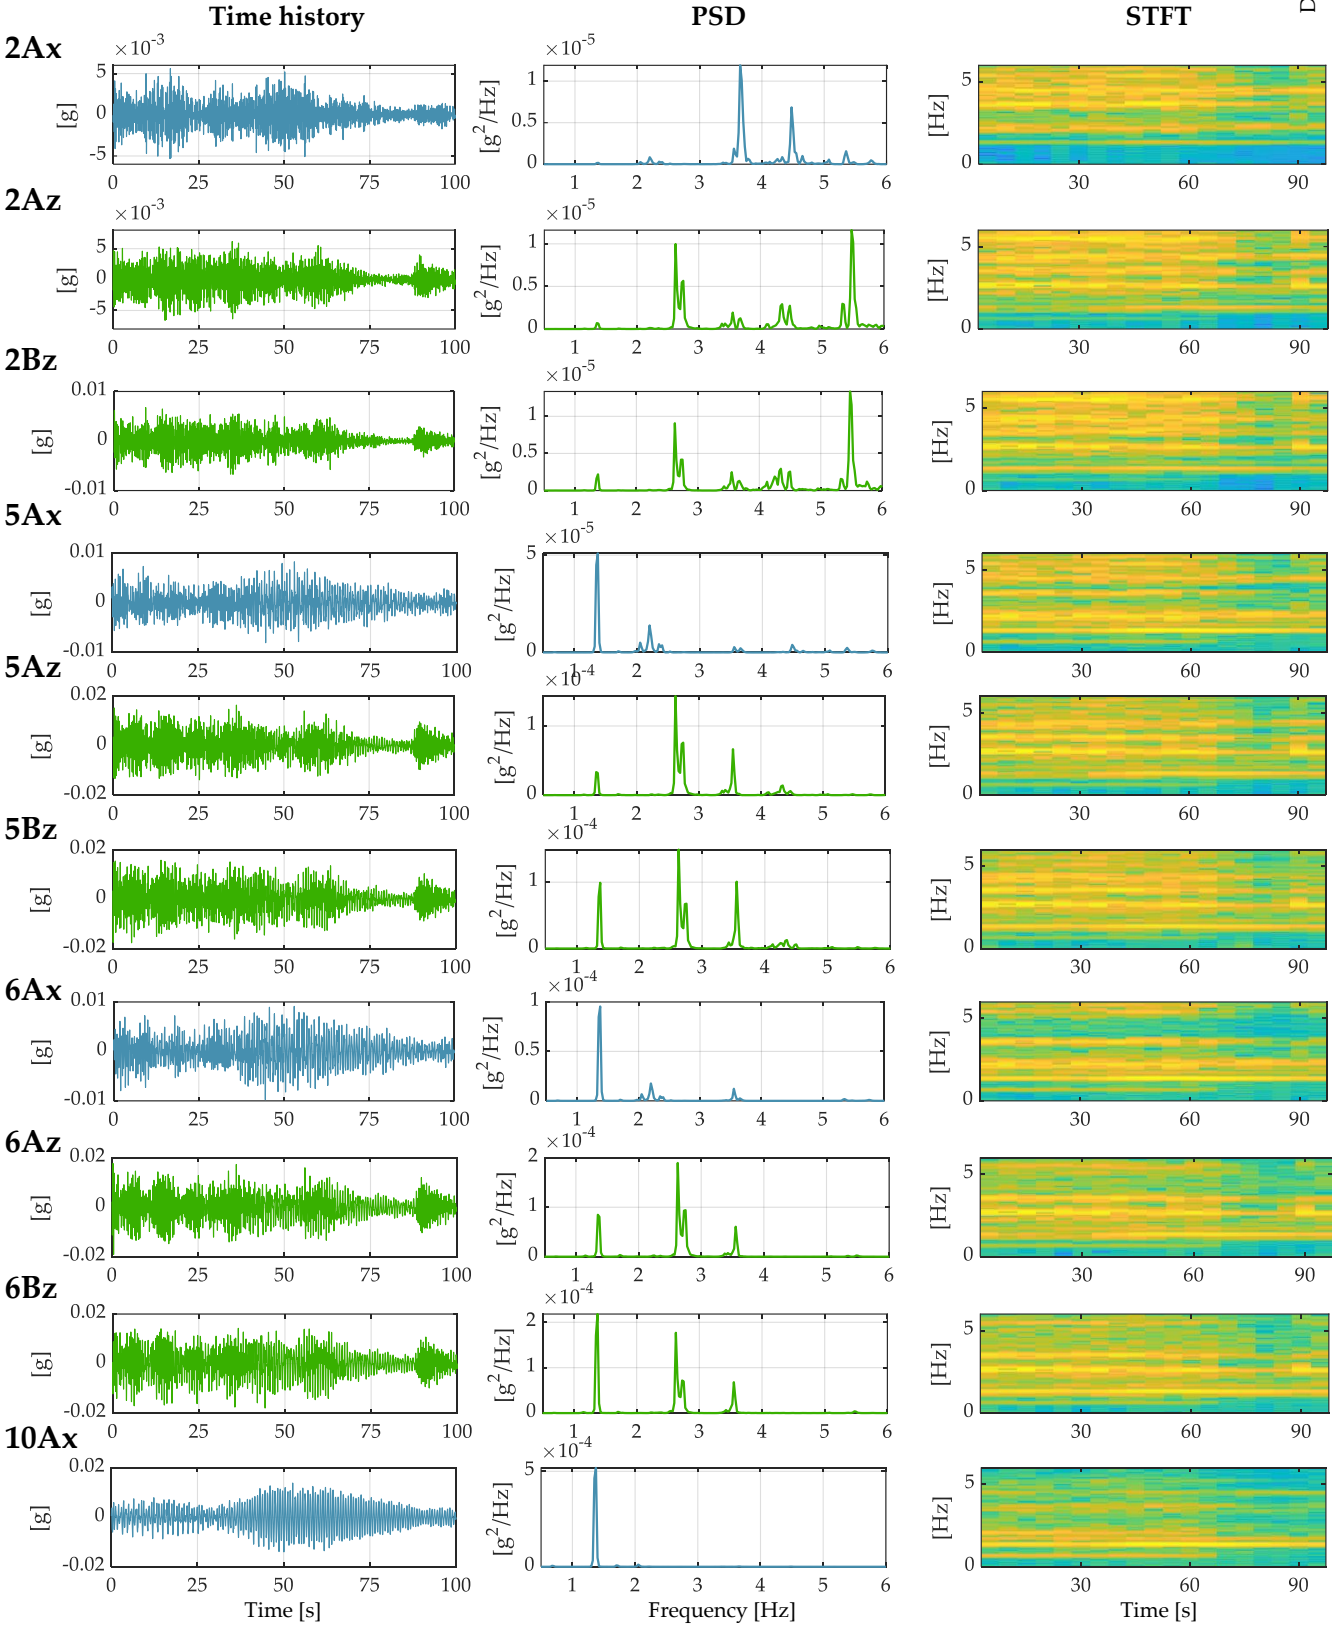

# Test PV6

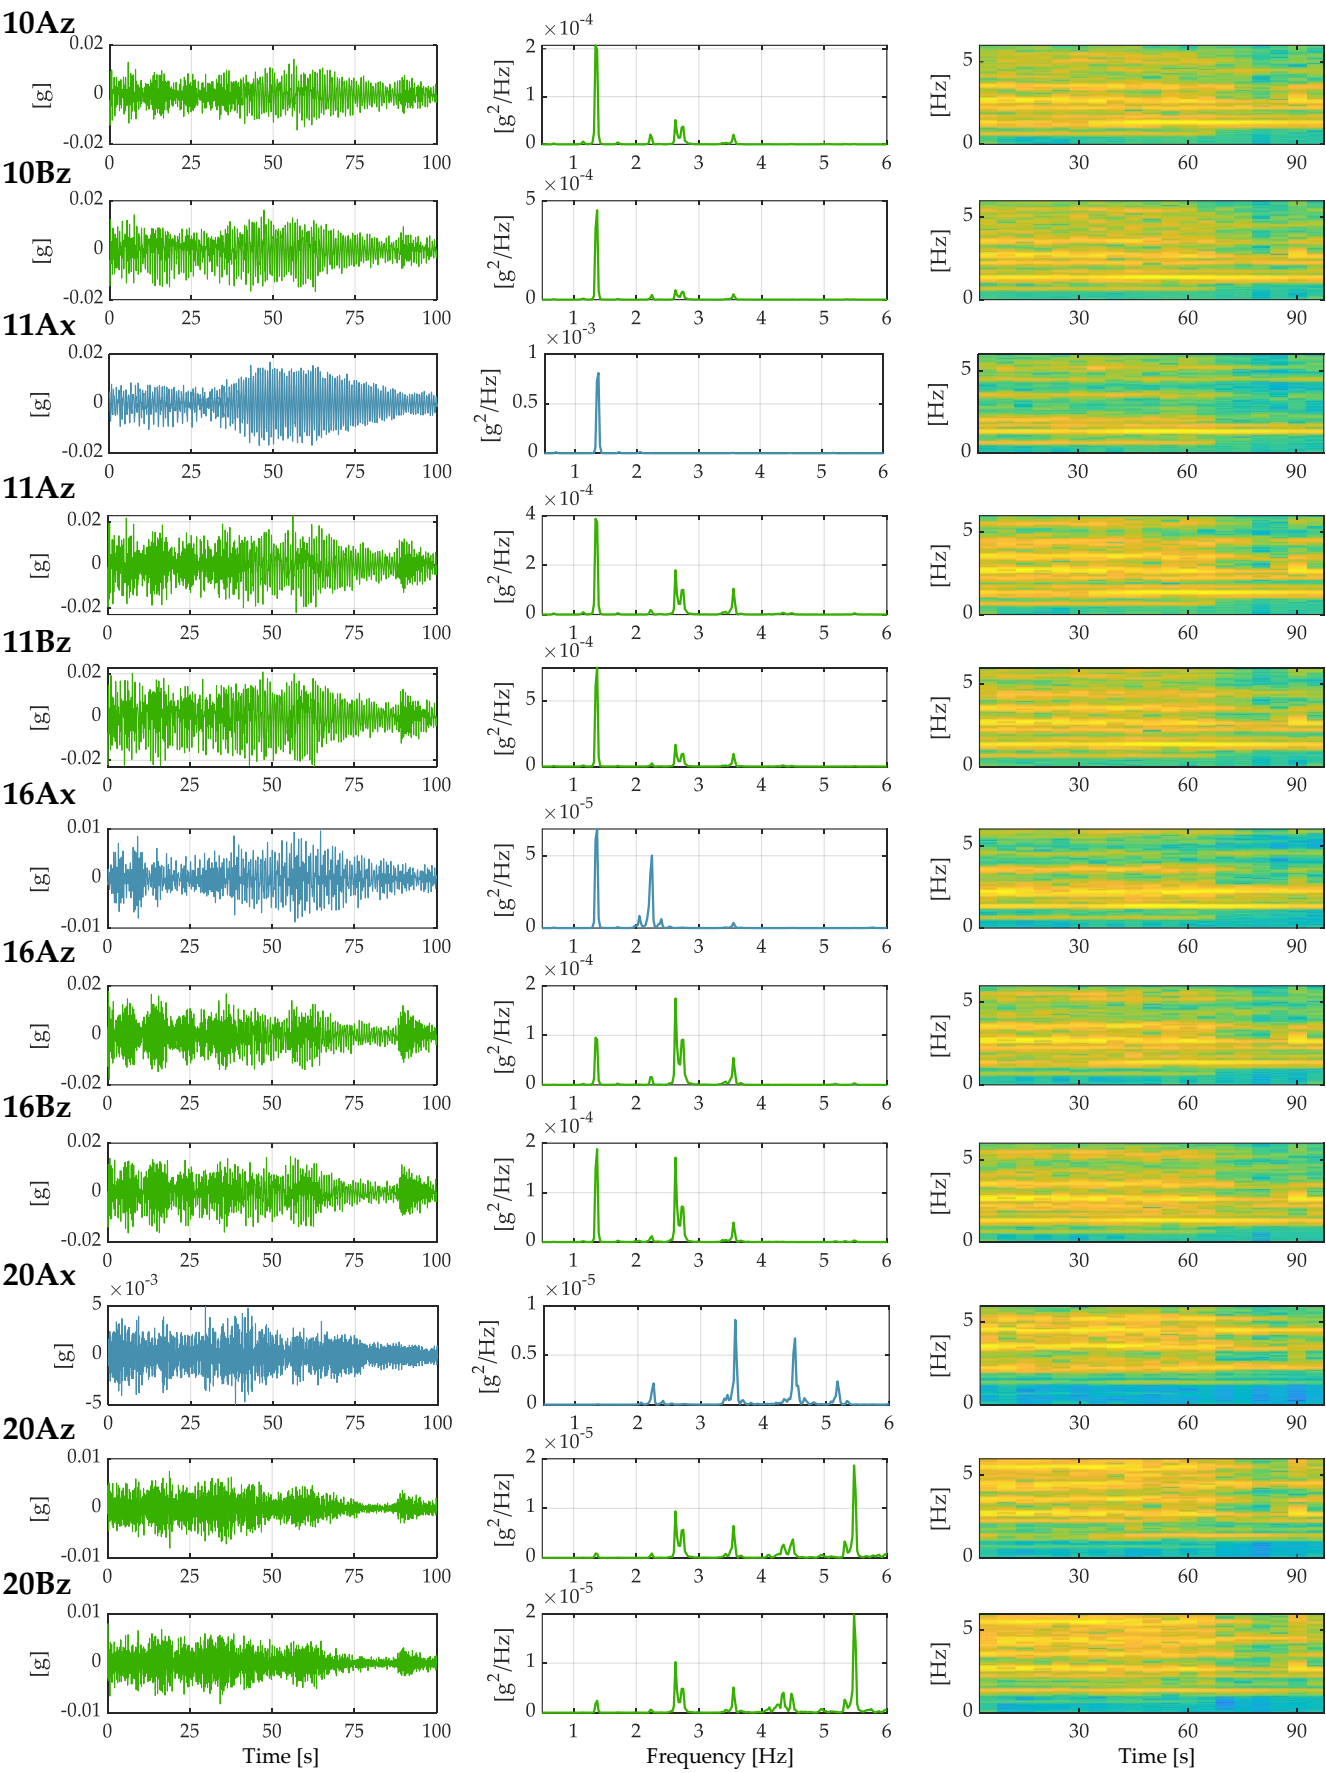

# Test PV7

Deck lateral view



Deck cross section

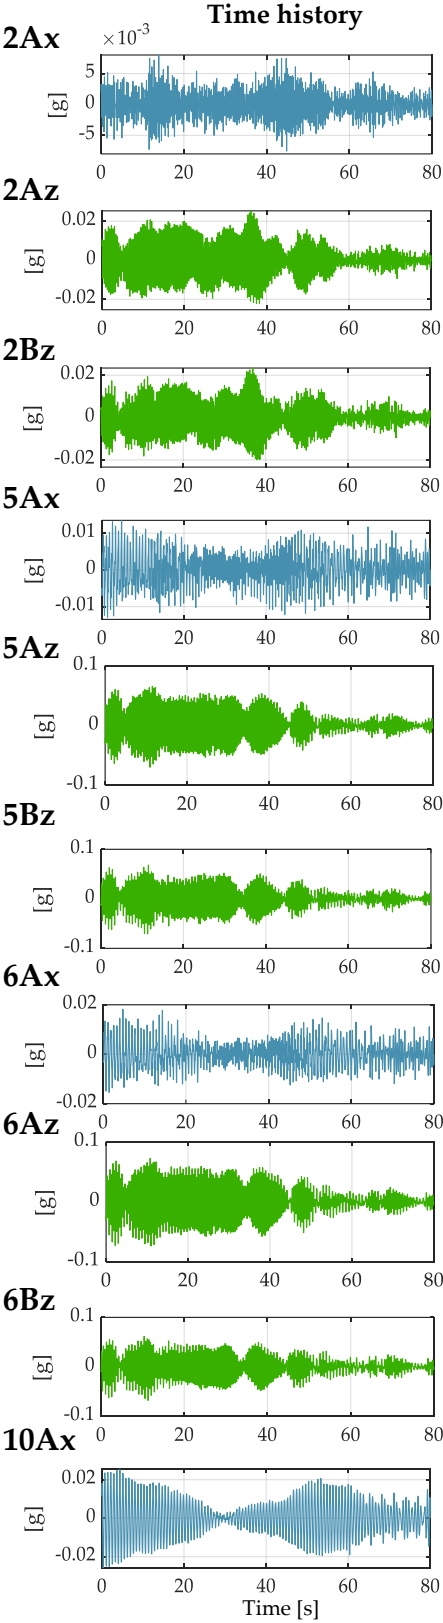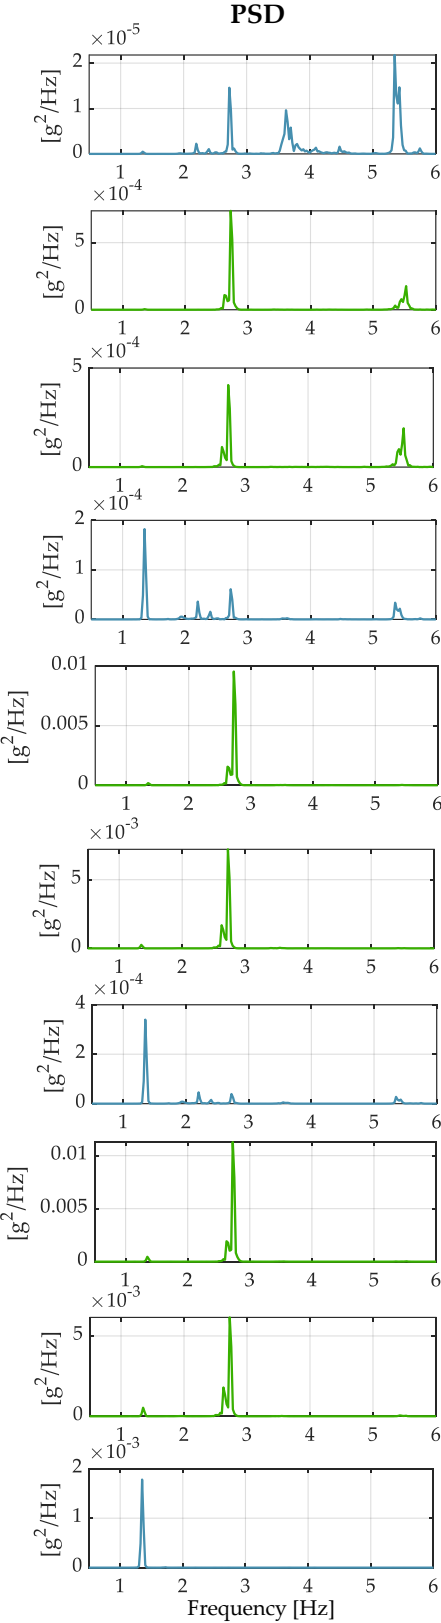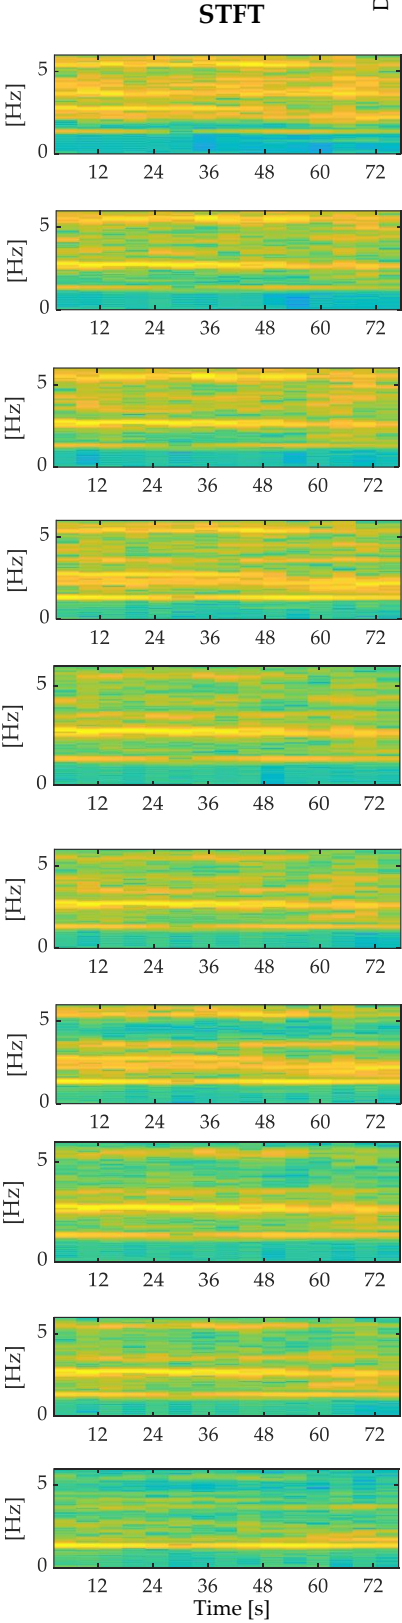

# Test PV7

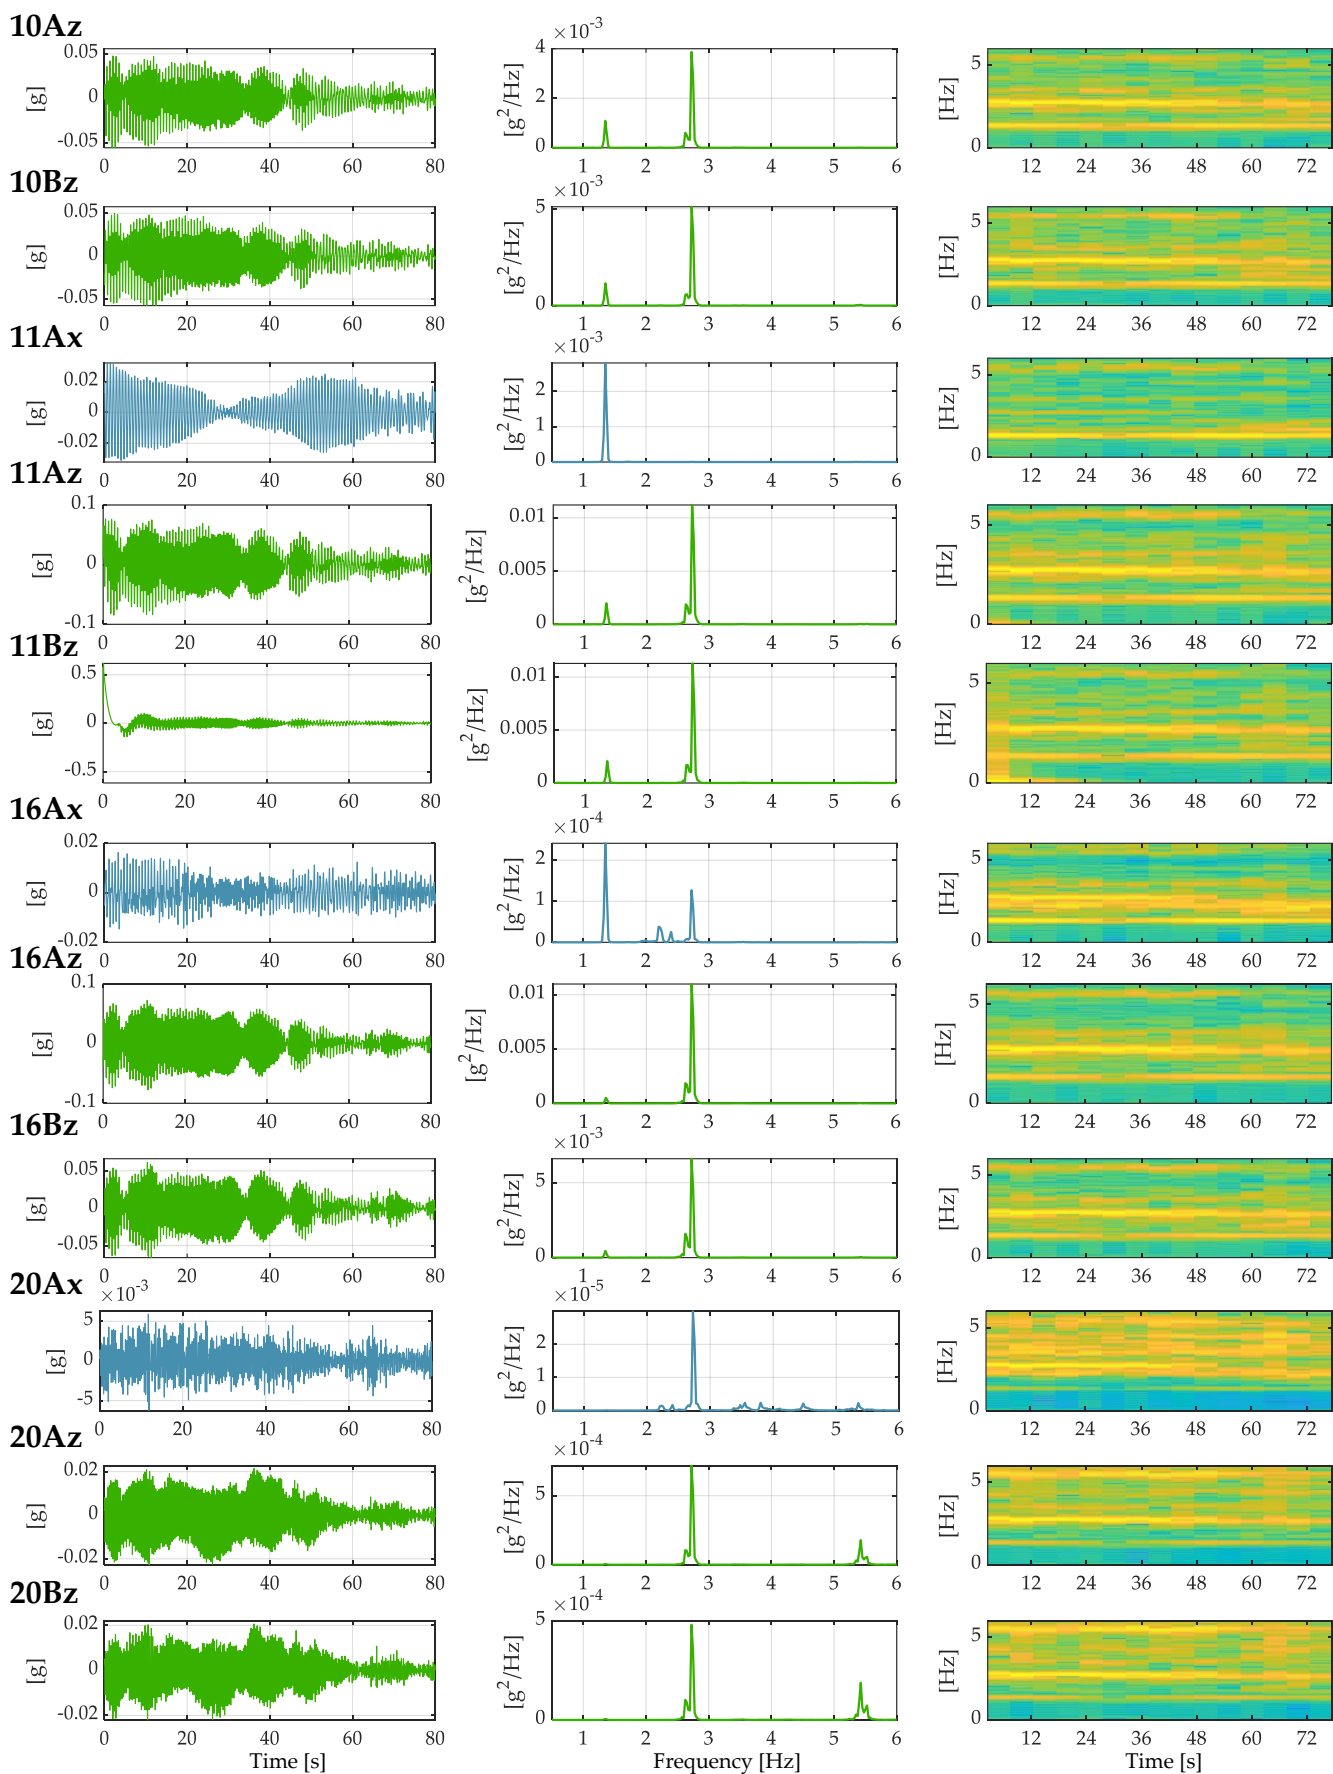

Supplement: s1 [file s1]
